# Supplementary material
Source: Research Square preprint supplement (doi:10.21203/rs.3.rs-9688977/v1)
Supplement: Supplementary file 1 [file 0c2f233df6c31f71bc5c2ebe.docx]

**This PDF file includes:**

Fig. S1 to S9

Table S1 to S2


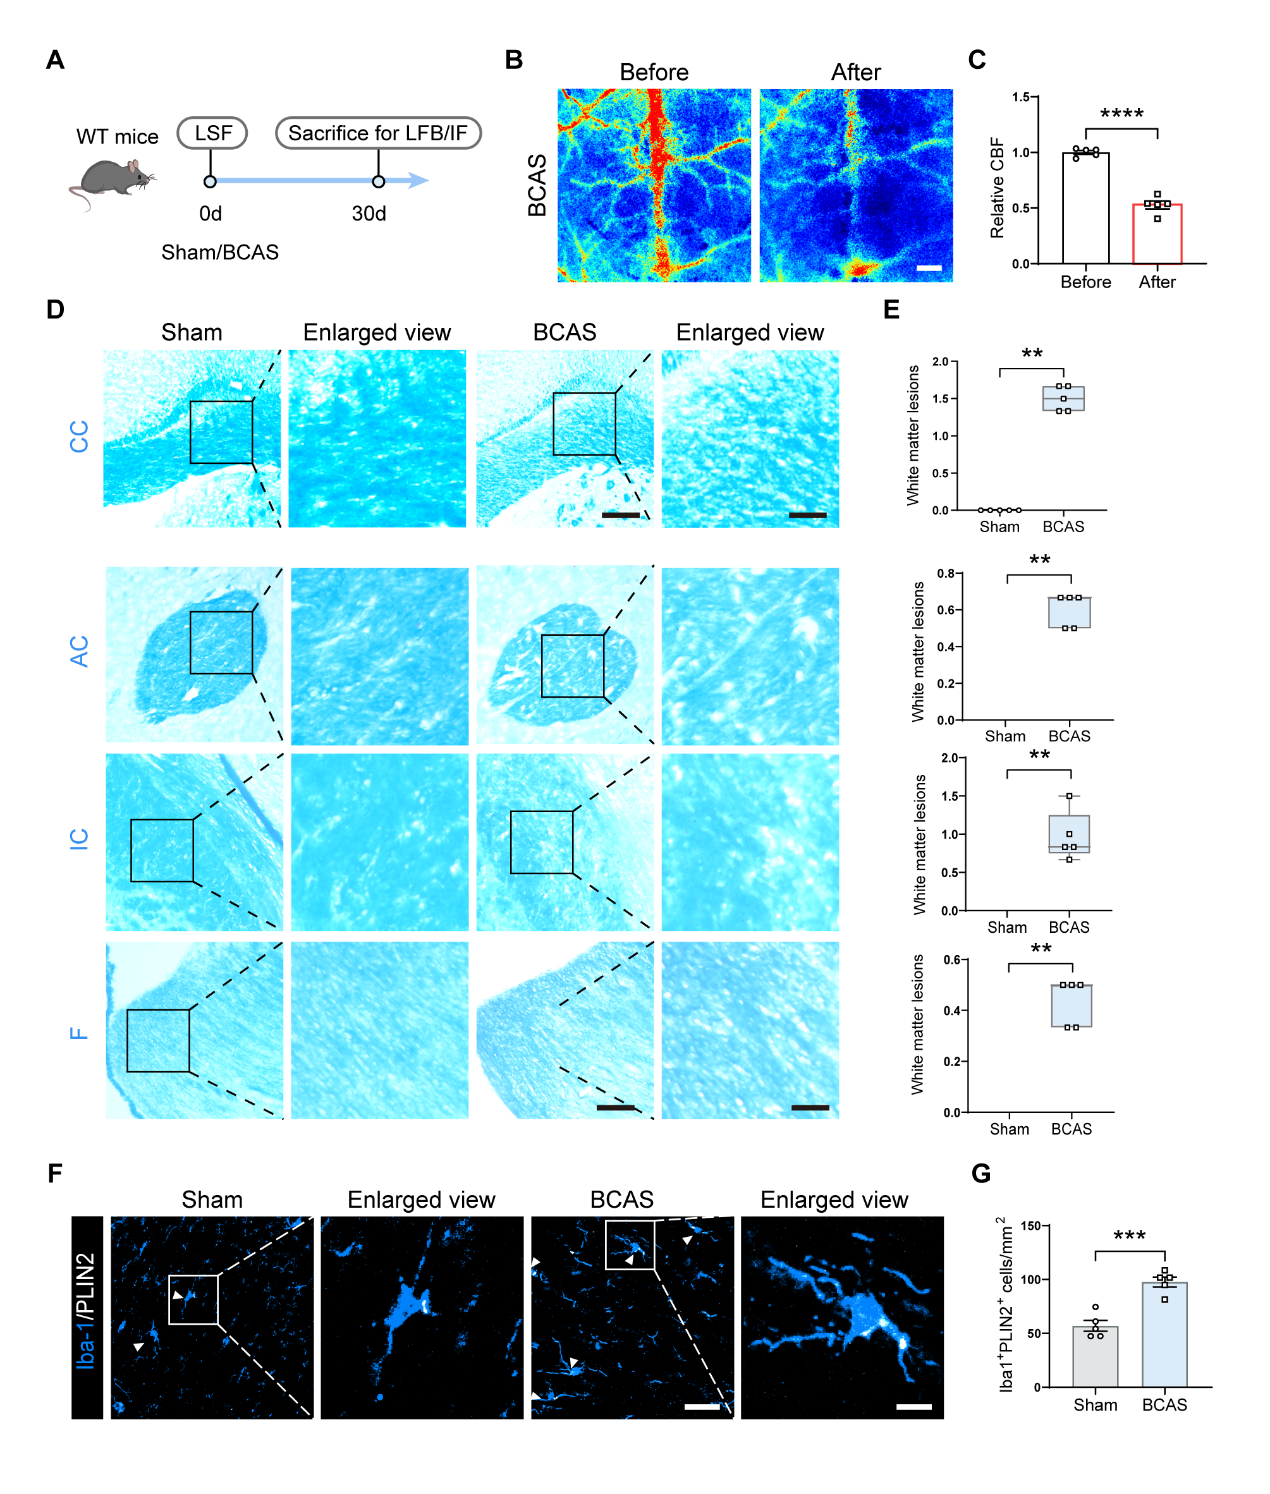


**Fig. S1 Chronic cerebral hypoperfusion induces white matter injury and lipid droplet accumulation in microglia.**

**(A),** Surgical diagram of bilateral common carotid artery stenosis (BCAS) modeling.
**(B),** Representative laser speckle images of cerebral blood flow (CBF) at different time points. Scale bar: 1 mm. **(C),** Quantitative analysis of relative CBF. ****P < 0.0001 Vs Sham. **(D),** Representative LFB staining of corpus callosum and other white matter regions. Scale bars: 200 μm (80 μm enlarged view); 100 μm (40 μm enlarged view). **(E),** Quantification of LFB scores. **P < 0.01 Vs Sham. **(F),** Immunofluorescence of PLIN2 colocalization with Iba1 (microglia) in corpus callosum. Arrowheads indicate double-labeled cells. Scale bars: 40 μm, 10 μm (enlarged view). **(G),** Quantification of PLIN2+Iba1+ cells. ***P < 0.001 Vs Sham. Mean ± SEM; n=5 mice per group. CBF and cell quantification: Unpaired t-test; LFB score: Mann-Whitney U test.

**
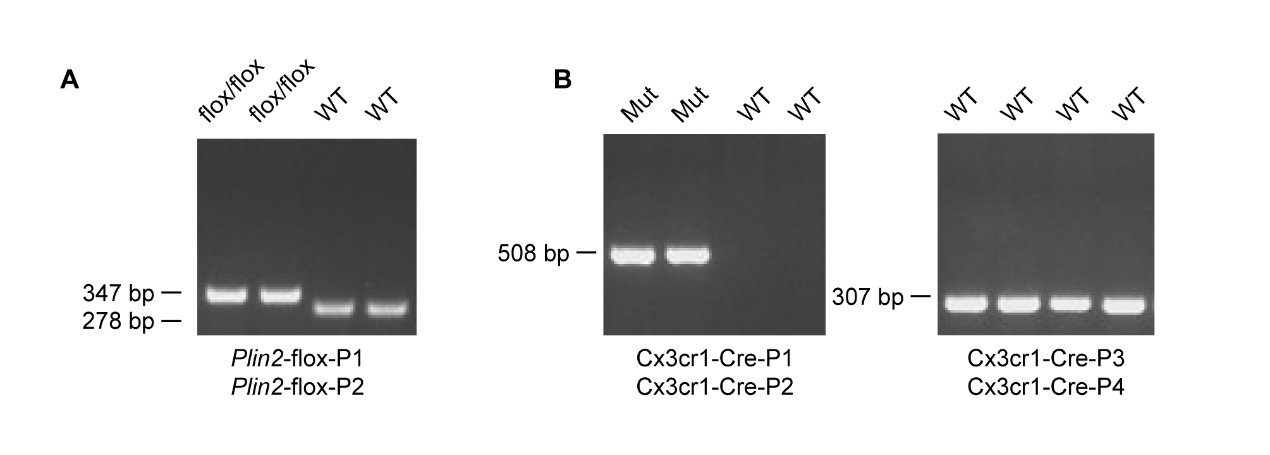
Fig. S2 Genotyping analysis of *Plin2*-flox and Cx3cr1-Cre mice by agarose gel electrophoresis.**

**(A),** *Plin2*-flox gene identification bands. **(B),** Cx3cr1-Cre gene identification bands.


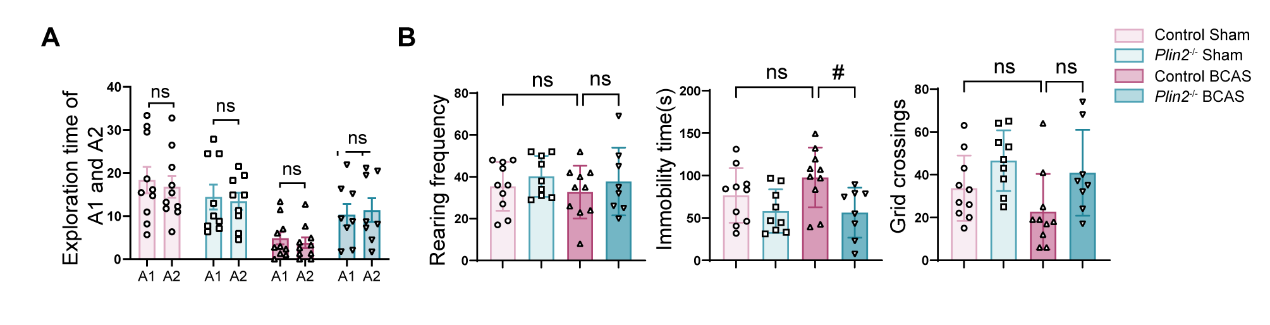
**Fig. S3 Behavioral performance in the novel object recognition across experimental groups.**

**(A),** Exploration time for objects A1 and A2 during NOR familiar phase showed no significant difference among groups. **(B),** Rearing frequency, immobility time, and grid crossings. #P<0.05 Vs Control BCAS mice; ns, no significant difference.


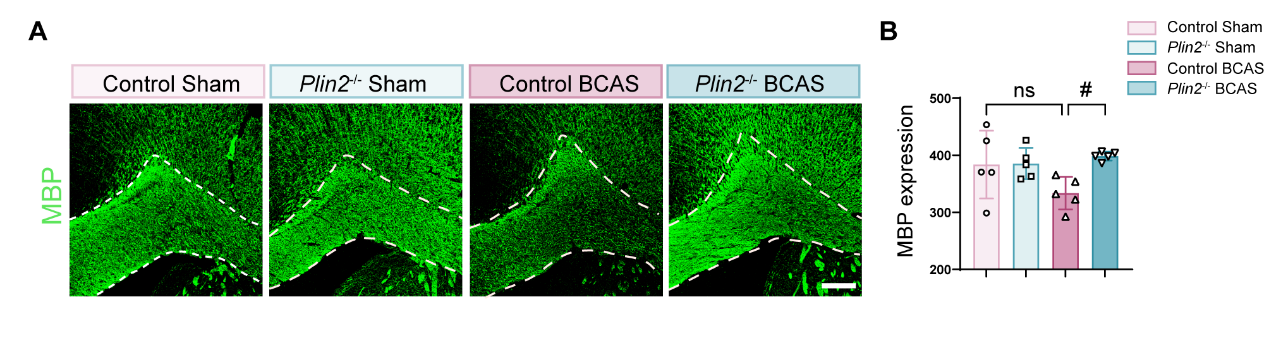
**Fig. S4 MBP expression across experimental groups.**

**(A),** Representative MBP immunofluorescence images. Scale bar: 150 μm. **(B),** Quantification of relative MBP expression. #P<0.05 Vs Control BCAS mice; ns, no significant difference. Mean ± SEM; n=5 mice/group; One-way ANOVA with Tukey’s test.


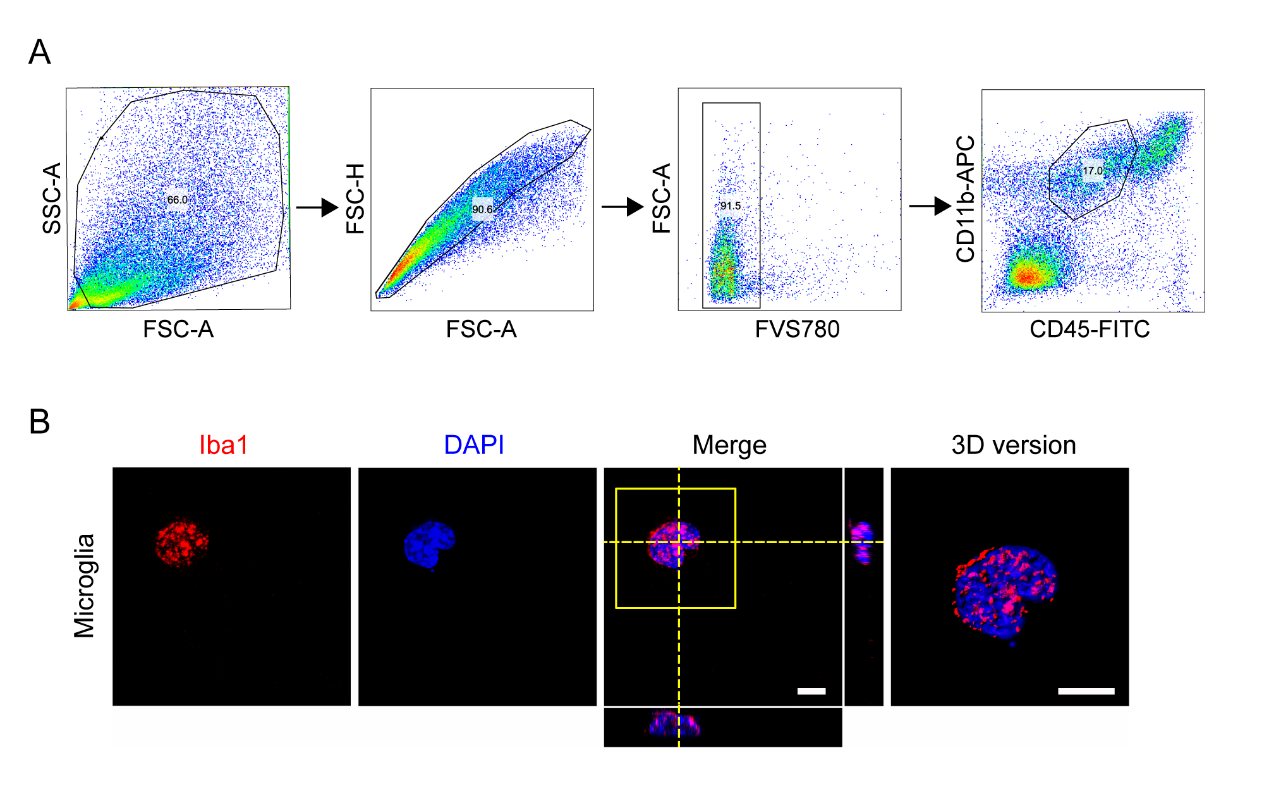
**Fig. S5 Flow cytometric and immunofluorescent characterization of isolated microglia.**

**(A),** Flow cytometry gating strategy: gating singlets (FSC-A Vs SSC-(A), 66.04%), single cells (FSC-A Vs FSC-H, 90.6%), viable cells (FSC-A Vs FVS780, 91.5%) and microglia population (FITC-A Vs APC-(A), 17.0%). **(B),** Immunofluorescence staining of microglia with DAPI (blue) and Iba-1 (red), with 3D reconstruction showing colocalization. Scale bar: 5 μm.


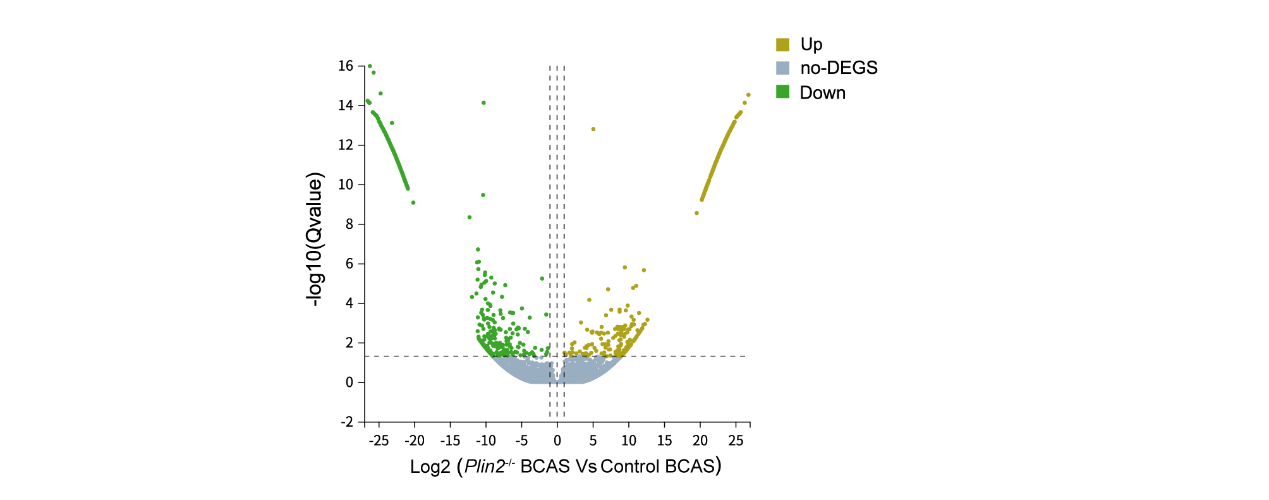
**Fig. S6 Differentially expressed genes (DEGs) in microglia between *Plin2⁻/⁻* BCAS and Control BCAS groups.**

Volcano plot analysis of differentially expressed genes in BCAS models between *Plin2* knockout and Control mice


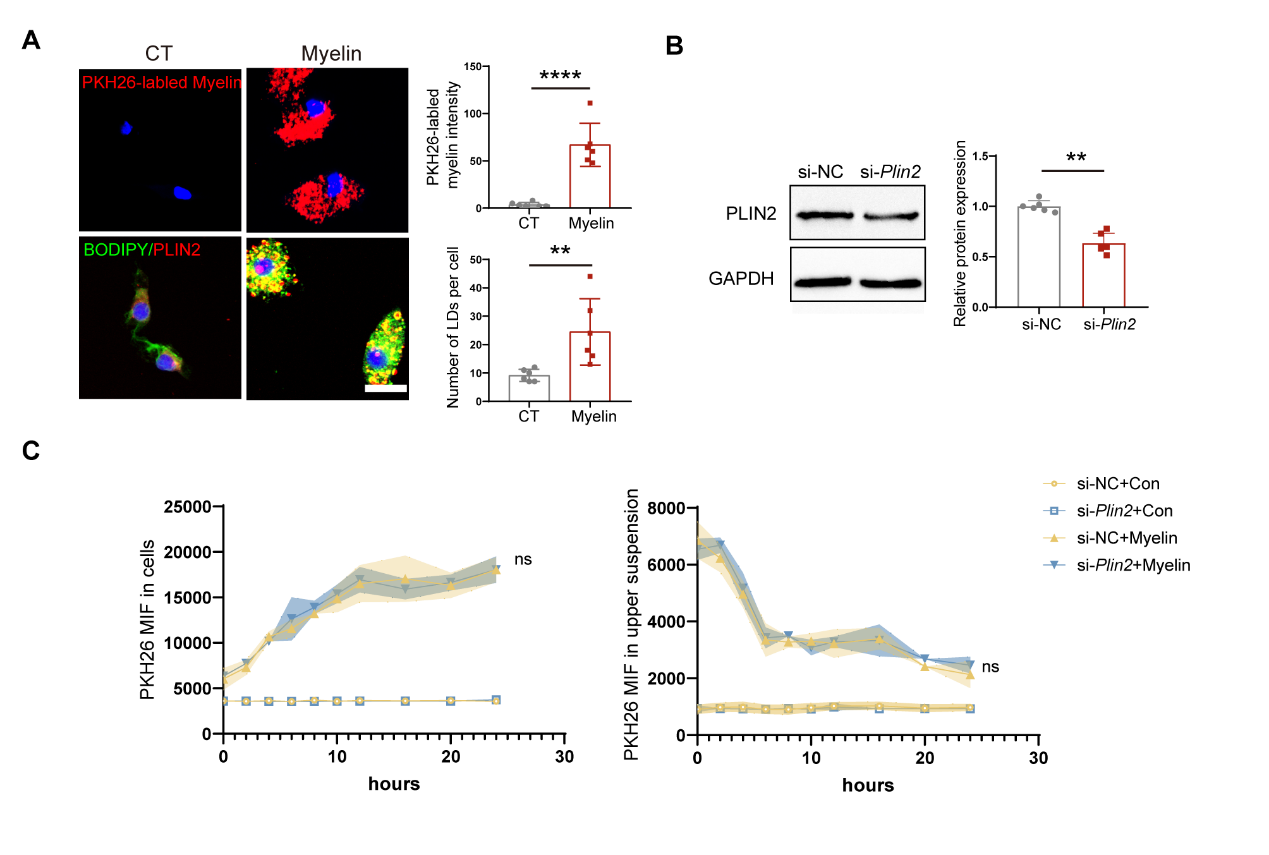
**Fig. S7 Microglial phagocytosis of myelin debris and PLIN2⁺ lipid droplet formation.**

**(A),** Confocal images of PKH26-labeled myelin and PLIN2+BODIPY staining in microglia under different treatments. Scale bar: 20 μm. Quantification shows PKH26 intensity, ****P < 0.0001 Vs CT group and lipid droplet number per cell **P < 0.01 Vs CT group. **(B),** Western blot confirming efficient *Plin2* knockdown in microglia. **(C),** Dynamic phagocytosis monitoring shows *Plin2* knockdown does not affect myelin debris uptake (PKH26 mean fluorescence intensity). Mean ± SEM; n=6 per group. Unpaired t-test.


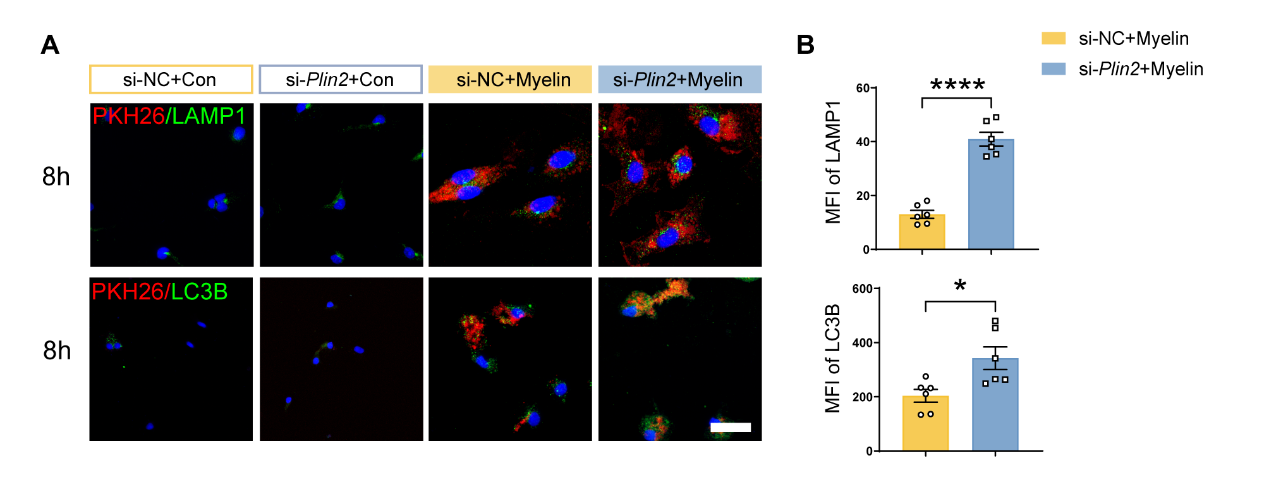
**Fig. S8 *Plin2* knockdown modulates the autophagy-lysosomal pathway during microglial myelin phagocytosis.**

**(A),** Confocal images of LAMP1, LC3B, and Iba1 co-staining in primary microglia at 8 h post-myelin exposure. Scale bar: 30 μm. **(B),** Quantification of Lamp1 and LC3B mean fluorescence intensity in Iba1⁺ cells at 8h. *P<0.05, ****P<0.0001 Vs si-NC group. Mean ± SEM; n=6 per group. One-way ANOVA with Tukey’s test.


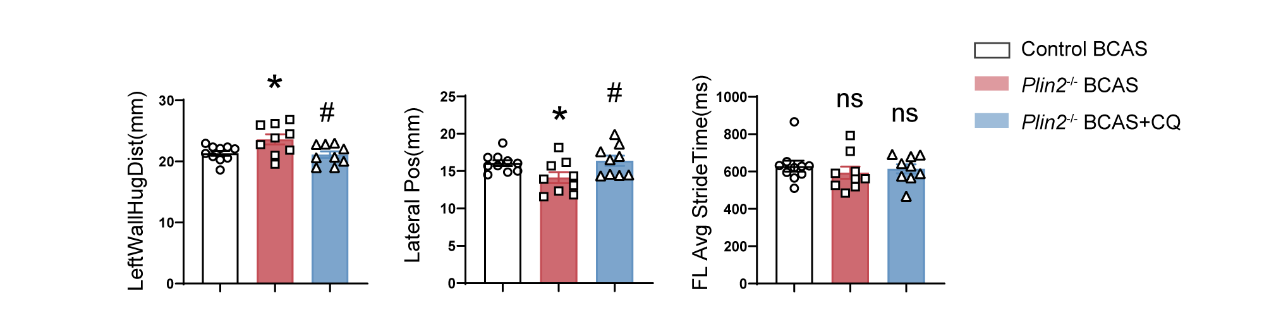
**Fig. S9 Gait analysis reveals PLIN2-dependent locomotor changes across experimental groups.**

Specific statistical charts showing LeftWallHugDist, Lateral Pos, and FL Avg Stride Time among the 3 groups. *P<0.05 Vs *Plin2*-/- BCAS mice; #P<0.05 Vs *Plin2*-/- BCAS mice. Mean ± SEM; n=9-10 per group; One-way ANOVA with Tukey multiple comparisons test.

**Table S1 List of applied antibodies**

| Target antigen | Source | Catalog # | Application |
| --- | --- | --- | --- |
| rat anti-MBP | Millipore | MAB386 | IF |
| mouse anti-MAG | Proteintech | 14386-1-AP | IF |
| rabbit anti-Iba1 | Wako | 019-19741 | IF |
| goat anti-Olig2 | R&D | AF2418 | IF |
| mouse anti-APC | Millipore | OP44 | IF |
| rabbit anti-NG2 | Millipore | AB5320 | IF |
| rabbit anti-Perilipin2 | Proteintech | 15294-1-AP | IF/WB |
| rabbit anti-LAMP1 | Abcam | Ab24170 | IF |
| rabbit anti-LC3B | Abclonal | A19665 | IF |
| mouse anti-GAPDH | BOSTER | BM1623 | WB |

**Table S2 List of primers sequences**

| Gene | Forward Primer | Reverse Primer | |
| --- | --- | --- | --- |
| IL-1β | GAAATGCCACCTTTTGACAGTG | | TGGATGCTCTCATCAGGACAG |
| IL-6 | CTGCAAGAGACTTCCATCCAG | | AGTGGTATAGACAGGTCTGTTGG |
| TNF-α | ACGGCATGGATCTCAAAGAC | | AGATAGCAAATCGGCTGACG |
| iNOS | GGAGTGACGGCAAACATGACT | | TCGATGCACAACTGGGTGAAC |
| IL-4 | CTGCAAGAGACTTCCATCCAG | | AGTGGTATAGACAGGTCTGTTGG |
| IL-10 | ACGGCATGGATCTCAAAGAC | | AGATAGCAAATCGGCTGACG |
| Arg-1 | GGAGTGACGGCAAACATGACT | | TCGATGCACAACTGGGTGAAC |
| MGL | ACTCCACAGAATGTTCCCTACCA | | GGCAAATACCAGCATGTCCAG |
| LIPA | GAAGGCACTAGGCGTGATGG | | AGACTCTGCTGTGGGCGATG |
| ATGL | AACCAAAGGACCTGATGACCAC | | ACATCAGGCAGCCACTCCAA |
| HSL | GAAACACCTGGTCTCTGAAGCAC | | CAGCCTTGAGAATGACCCACA |
| LPL | TTGTAGTAGACTGGTTGTATCGGGC | | AAATCAGCGTCATCAGGAGAAAG |
| GAPDH | CCTCGTCCCGTAGACAAAATG | | TGAGGTCAATGAAGGGGTCGT |
